# Supplementary material
Source: publisher figshare collection journal article supplement (https://gsapubs.figshare.com/ndownloader/files/22742006)
Supplement: Supplementary file 1 [file 22742006]

## APPENDIX A. GEOCHRONOLOGIC DATA FOR GLACIAL ADVANCES, WESTERN UNITED STATES

### Rocky Mountain Region

Age control for glacier fluctuations in the Rocky Mountain region is provided by obsidian hydration, radiocarbon, U/Th, and  $^{10}\text{Be}$  ages, and age estimates based on weathering rinds. U/Th ages from Sturchio et al. (1994, Figure 10) are not listed here for Figure 2A. Ages listed here are keyed to ages in Figure 2B based on numbers in parentheses following each age. Pierce (in Porter et al., 1983) compiled many of these data with the exception of ages reported since that publication. Evenson et al. (1994) reported a  $^{10}\text{Be}$  age of  $10.9 \pm 0.5$  (1) for a moraine from the Wind River Mountains, Wyoming. Pierce (1979) reported a  $^{14}\text{C}$  of  $11,600 \pm 350$  (W-2767) (2) on deglaciation from an advance in the Yellowstone region, Wyoming. Reasoner et al. (1994) reported radiocarbon ages of  $10,070 \pm 420$  yr B.P. (CAMS-3177) (3) and  $11,330 \pm 220$  yr B.P. (CAMS-3065) (3) that bracket a glacial advance in the Canadian Rockies of Alberta. Pierce (1979) reported a radiocarbon age of  $13,140 \pm 700$  yr B.P. (W-2037) (4) that predates a glacial advance in the Yellowstone region, Wyoming. Pierce (1979) reported two radiocarbon ages of  $14,490 \pm 350$  (W-3183) (5) and  $14,360 \pm 400$  yr B.P. (W-2780) (6) that date deglaciation of the Yellowstone Plateau, Wyoming. Pierce et al. (1976) obtained ages from obsidian hydration rinds that suggest an age of 10-15 ka (7) for readvance of the Yellowstone ice cap, whereas Colman and Pierce (1986) suggested an age of about 14 ka (7) for glacier readvance at McCall, Idaho, from weathering rinds. Evenson et al. (1994) reported a  $^{10}\text{Be}$  age of  $15.5 \pm 0.6$  ka (8) for a moraine from the Wind River Mountains, Wyoming. Weathering rinds suggest an age of about 20 ka (9) for a glacier advance at McCall, Idaho (Colman and Pierce, 1986). Pierce (in Porter et al., 1983) reported a radiocarbon age of  $20,800 \pm 1200$  yr B.P. (W-998) (10) that provides a minimum age for glacier advance in the Wind River Mountains. Evenson et al. (1994) reported a  $^{10}\text{Be}$  age of  $21 \pm 1.5$  ka (11) for a moraine from the Wind River Mountains, Wyoming. Madole (1986) reported a radiocarbon age of  $22,400 +1070/-1320$  yr B.P. (DIC-870) (12) on lake sediments dammed by an

advance of ice in the Colorado Front Range. Nelson et al. (1979) reported radiocarbon ages of  $30,050 \pm 1200$  yr B.P. (SI-2912) (13) and  $30,480 +2800/-4300$  yr B.P. (DIC-482) (14) on organic matter separating tills in the Colorado Front Range, Colorado. Obsidian hydration rinds suggest an age of 30-40 ka (15) for deposits in the West Yellowstone area (Pierce et al., 1976): Pierce (in Porter et al, 1979) suggests an age of 35 ka. Similar ages are suggested from calibrated age from weathering rinds (16) (Colman and Pierce, 1981). Colman and Pierce (1986) suggest an age of 50 ka for glacial deposits associated with the Williams Creek advance at McCall, Idaho, based on calibrated ages from weathering rinds (17).

### **Puget Lobe, Cordilleran Ice Sheet**

Age control for advances of the Puget Lobe is provided entirely by radiocarbon dating. Hicock and Armstrong (1981) reported a radiocarbon age of  $11,000 \pm 170$  yr B.P. (I-5346) (1) on organic matter that post-dates the Sumas advance, and radiocarbon ages of  $11,300 \pm 100$  yr B.P. (GSC-2523) (2) and  $11,700 \pm 150$  yr B.P. (L-3313) (3) on organic matter associated with the Sumas advance. Radiocarbon ages that postdate the Vashon advance are  $13,500 \pm 200$  yr B.P. (GSC-3124) (4),  $13,650 \pm 350$  yr B.P. (Beta-1319) (5), and  $13,650 \pm 550$  yr B.P. (L-346A) (6) (Clague, 1981; Booth, 1987). Radiocarbon ages that predate the Vashon advance are  $15,000 \pm 400$  yr B.P. (W-1227) (7),  $16,070 \pm 600$  yr B.P. (W-2125) (8), and  $17,800 \pm 150$  yr B.P. (GSC-2297) (9) (Clague, 1981; Booth, 1987). A radiocarbon age that postdates Coquitlam Drift is  $18,700 \pm 170$  yr B.P. (GSC-2344) (10), whereas radiocarbon ages that predate the advance that deposited Coquitlam Drift are  $21,500 \pm 240$  yr B.P. (GSC-2536) (11),  $21,600 \pm 200$  yr B.P. (GSC-2203) (12), and  $28,800 \pm 310$  yr B.P. (GSC-95) (13) (Clague, 1981). Radiocarbon ages from the Olympia Nonglacial Interval are  $25,800 \pm 310$  yr B.P. (GSC-2273) (14),  $40,500 \pm 1700$  yr B.P. (GSC-2167) (15), and  $58,800 +2900/-2100$  yr B.P. (QL-195) (16) (Clague, 1981).

### **Cascade Range**

Glacial deposits from the Cascade Range are very poorly dated, and the suggested age for much of this record is inferred from parallelism with other, better dated sequences. Porter (1978) reported a

radiocarbon age of  $11,050 \pm 50$  yr B.P. (UW-321) (1) on organic matter that postdates a glacial advance, and a radiocarbon age of  $13,570 \pm 130$  yr B.P. (UW-35) (2) for retreat of a glacier thought to have advanced at the same time as the Vashon advance of the Puget lobe (Porter, 1976). No direct age control is available for this event and its age is inferred on the basis of stratigraphic relations and correlation to  $^{14}\text{C}$ -dated Coquitlam Drift (3) (Crandell and Miller, 1974). Weathering rinds indicate that an advance in the Cascade Range is  $>>28$  ka and  $<45$  ka (4), and may be correlative with the 30-40 ka advance of the Yellowstone ice cap (Colman and Pierce, 1981).
